# Supplementary material
Source: Royal Society of Chemistry journal article supplement (doi:10.1039/d6ma00109b)
Supplement: d6ma00109b3.pdf [file d6ma00109b3.pdf]

Supplementary Information

## **Breathable, Water-Repellent $\gamma$ -MnOOH Nest by Vapor-Assisted Conversion**

Takahiro Kozawa<sup>1,\*</sup>, Kayo Fukuyama<sup>1</sup>, Minoru Osada<sup>2</sup>, Hiroya Abe<sup>1</sup>

*1. Joining and Welding Research Institute, The University of Osaka, 11-1 Mihogaoka, Ibaraki, Osaka 567-0047, Japan*

*2. Institute of Materials and Systems for Sustainability (IMaSS) and department of Chemistry, Nagoya University, Nagoya 464-8601, Japan*

\* Corresponding author: kozawa.takahiro.jwri@osaka-u.ac.jp

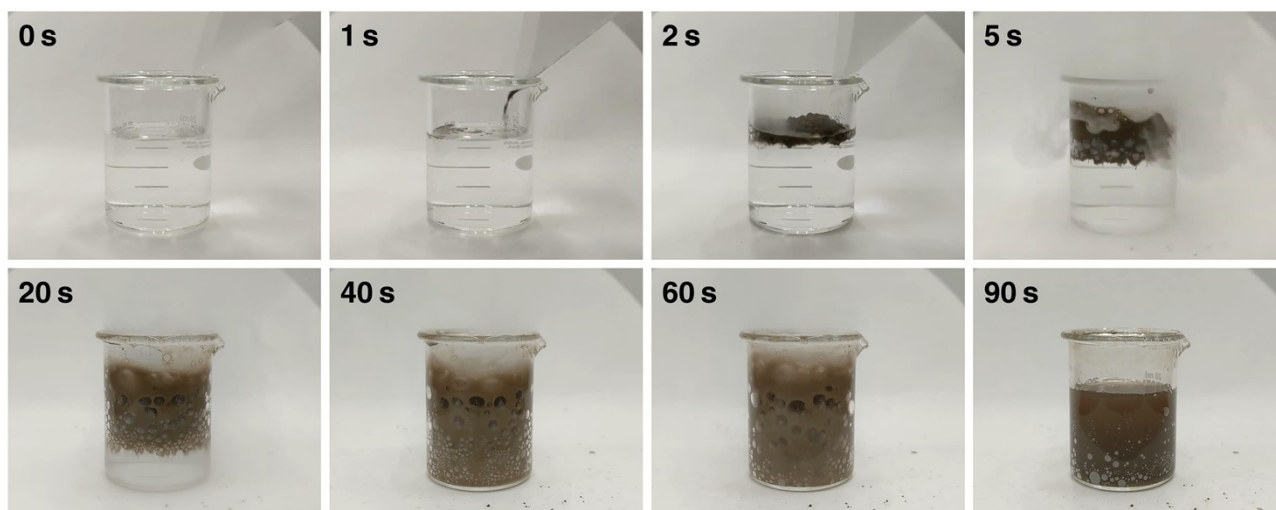

**Figure S1.** Time-lapse photographs of an H<sub>2</sub>O<sub>2</sub> solution following the addition of MnCO<sub>3</sub> powder.

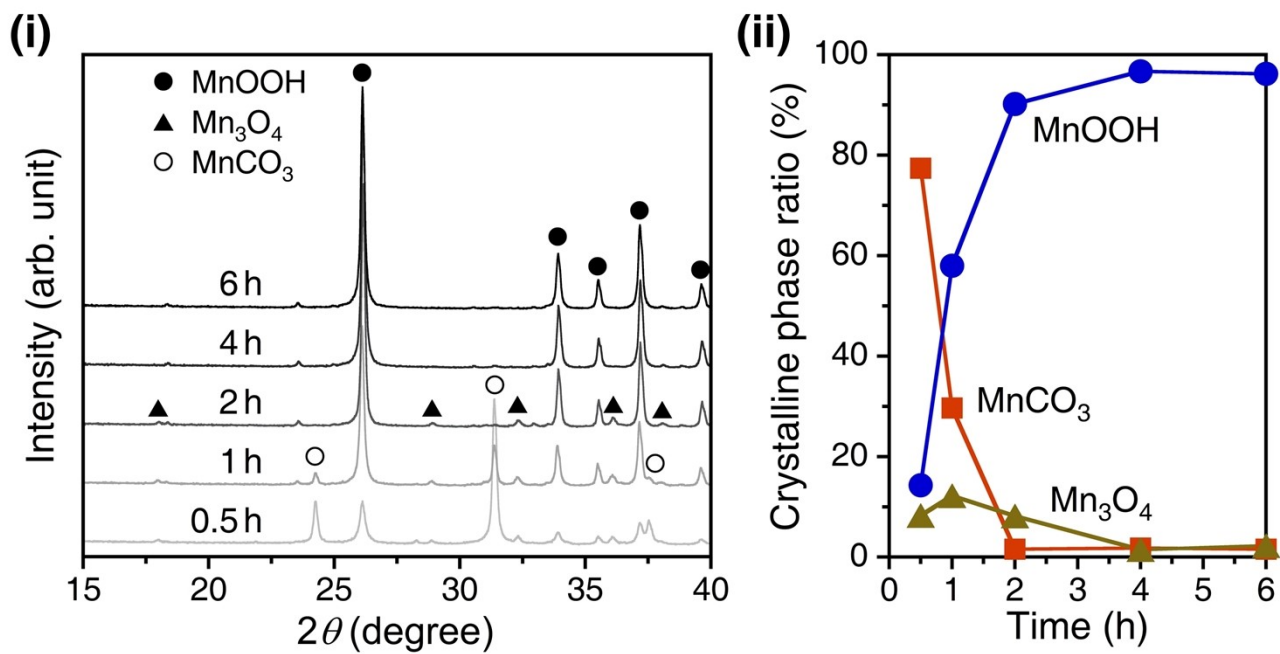

**Figure S2.** (i) XRD patterns and (ii) semi-quantitative analysis of the crystalline phase composition of MnCO<sub>3</sub> powder samples after exposure to 5% H<sub>2</sub>O<sub>2</sub> vapor.

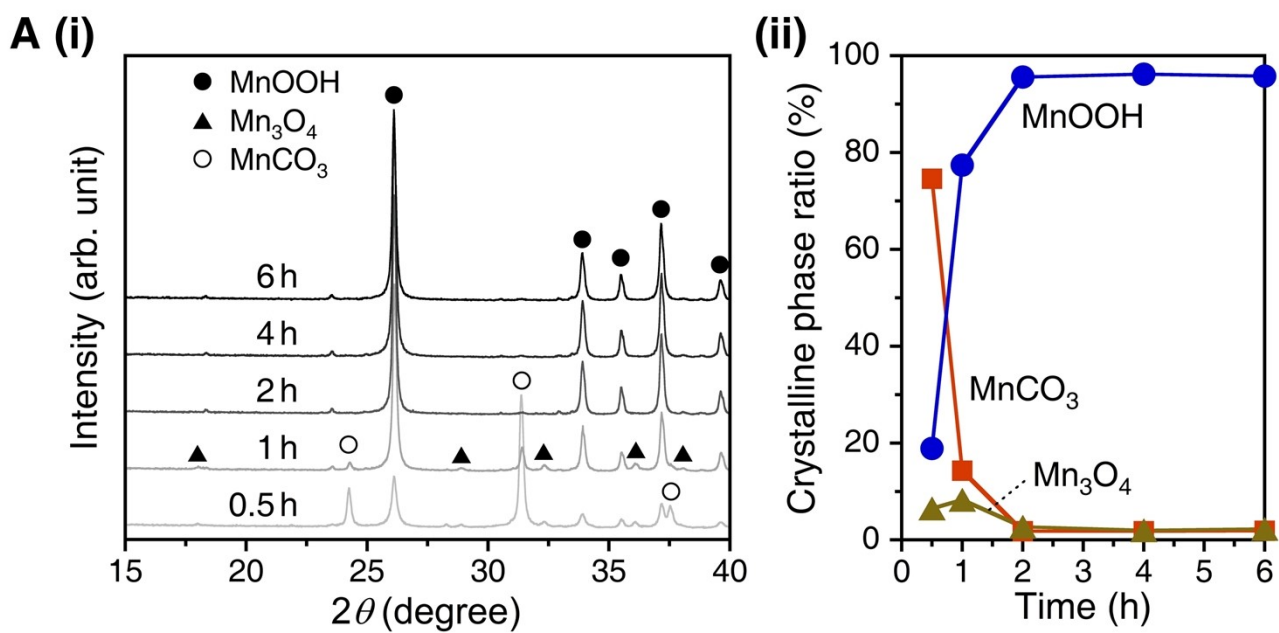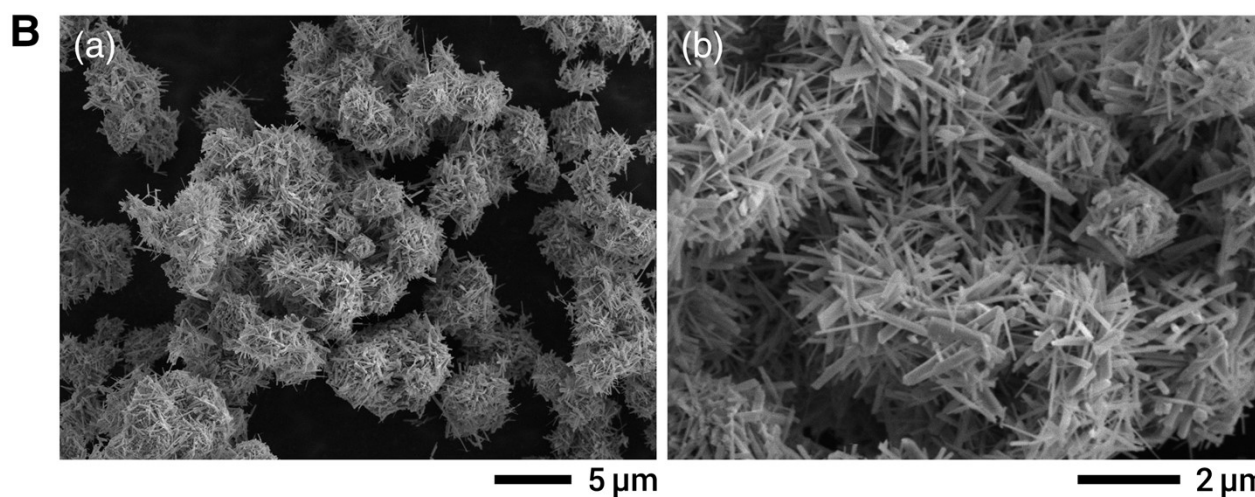

**Figure S3.** (A) (i) XRD patterns and (ii) semi-quantitative analysis of the crystalline phase composition of  $\text{MnCO}_3$  powder samples after exposure to 10%  $\text{H}_2\text{O}_2$  vapor. (B) SEM images of the sample after 6 h: (a) overview and (b) magnified view.

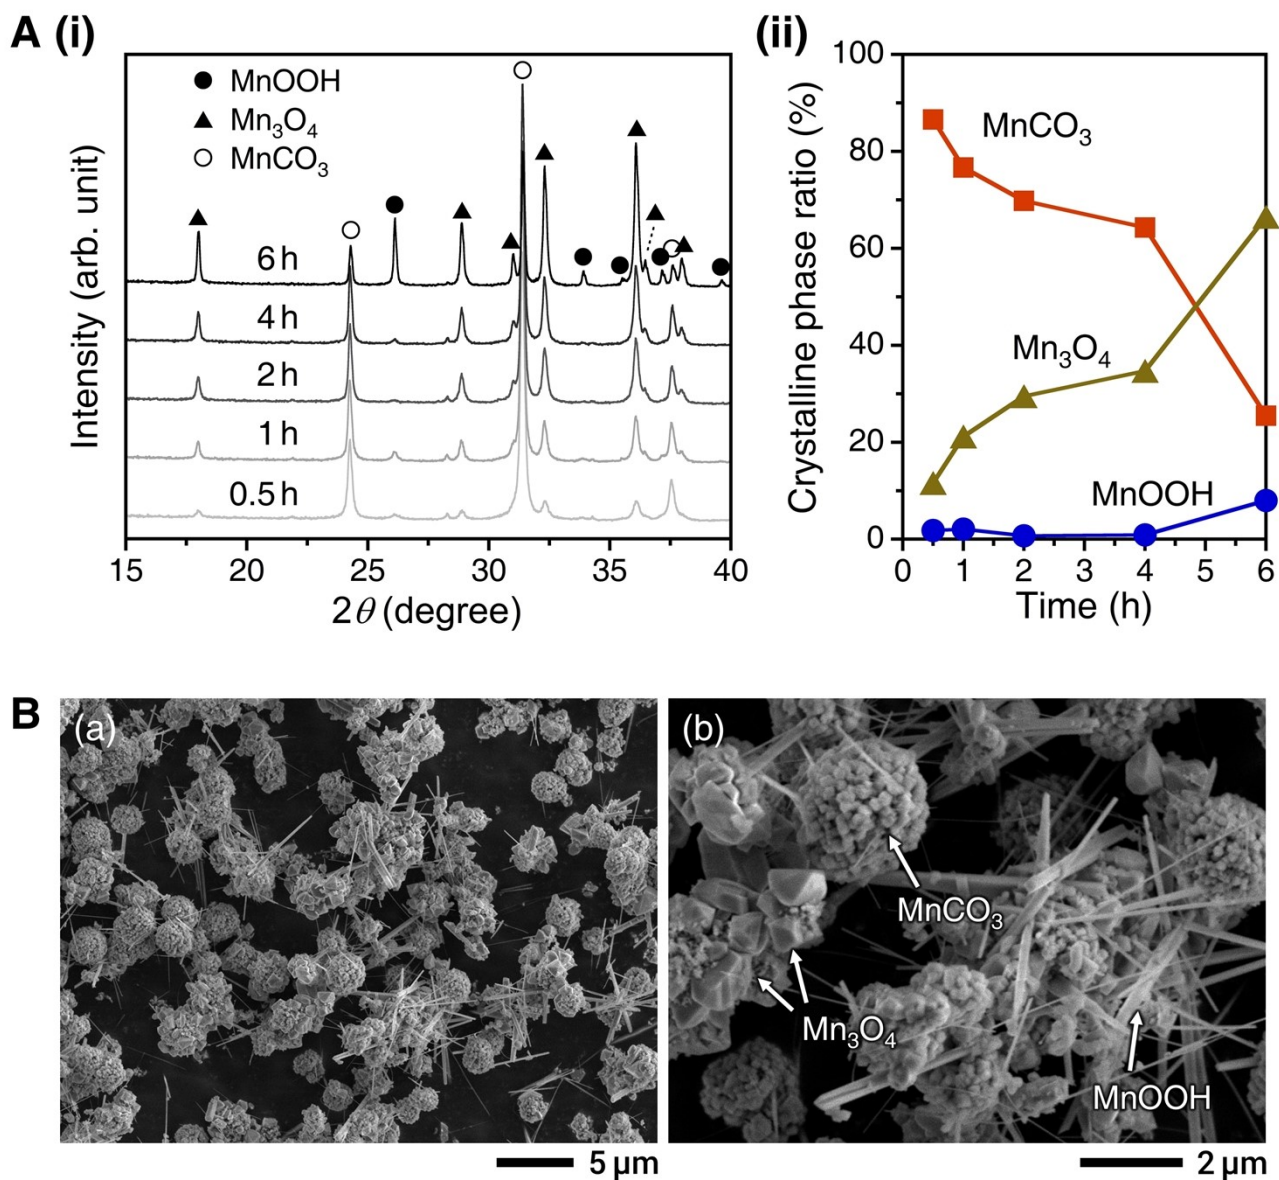

**Figure S4.** (A) (i) XRD patterns and (ii) semi-quantitative analysis of the crystalline phase composition of  $\text{MnCO}_3$  powder samples after exposure to water vapor. (B) SEM images of the sample after 6 h: (a) overview and (b) magnified view.

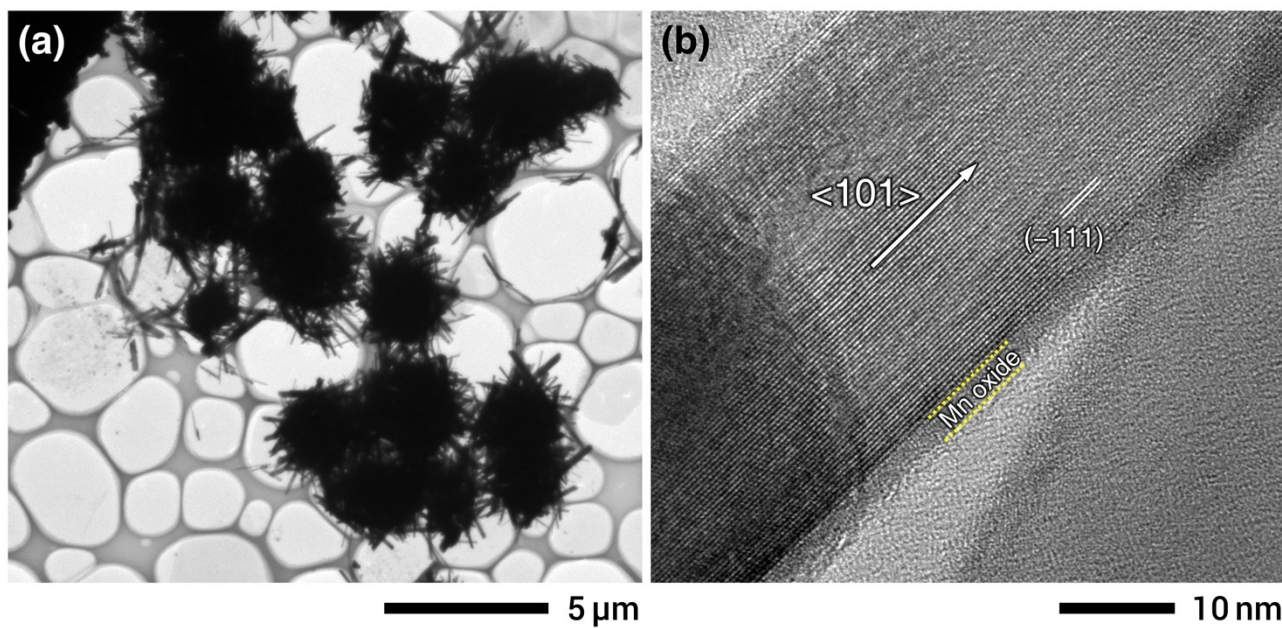

**Figure S5.** (a) TEM image of needle-like  $\gamma$ -MnOOH aggregates obtained after 2 h of exposure to 10%  $\text{H}_2\text{O}_2$  vapor. (b) HR-TEM image of the needle-like  $\gamma$ -MnOOH particle.

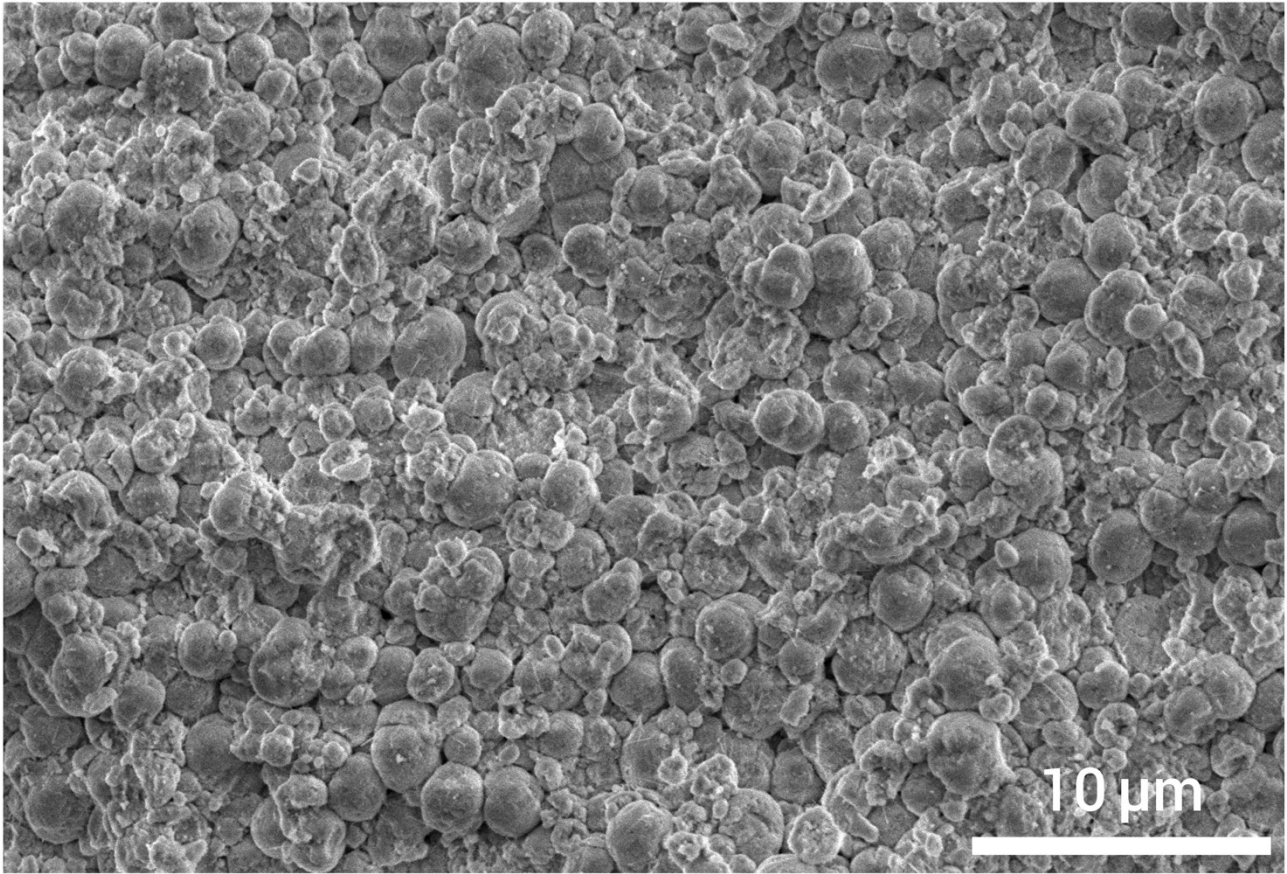

**Figure S6.** SEM image of the MnCO<sub>3</sub> powder compact fabricated via hydrothermal hot-pressing.

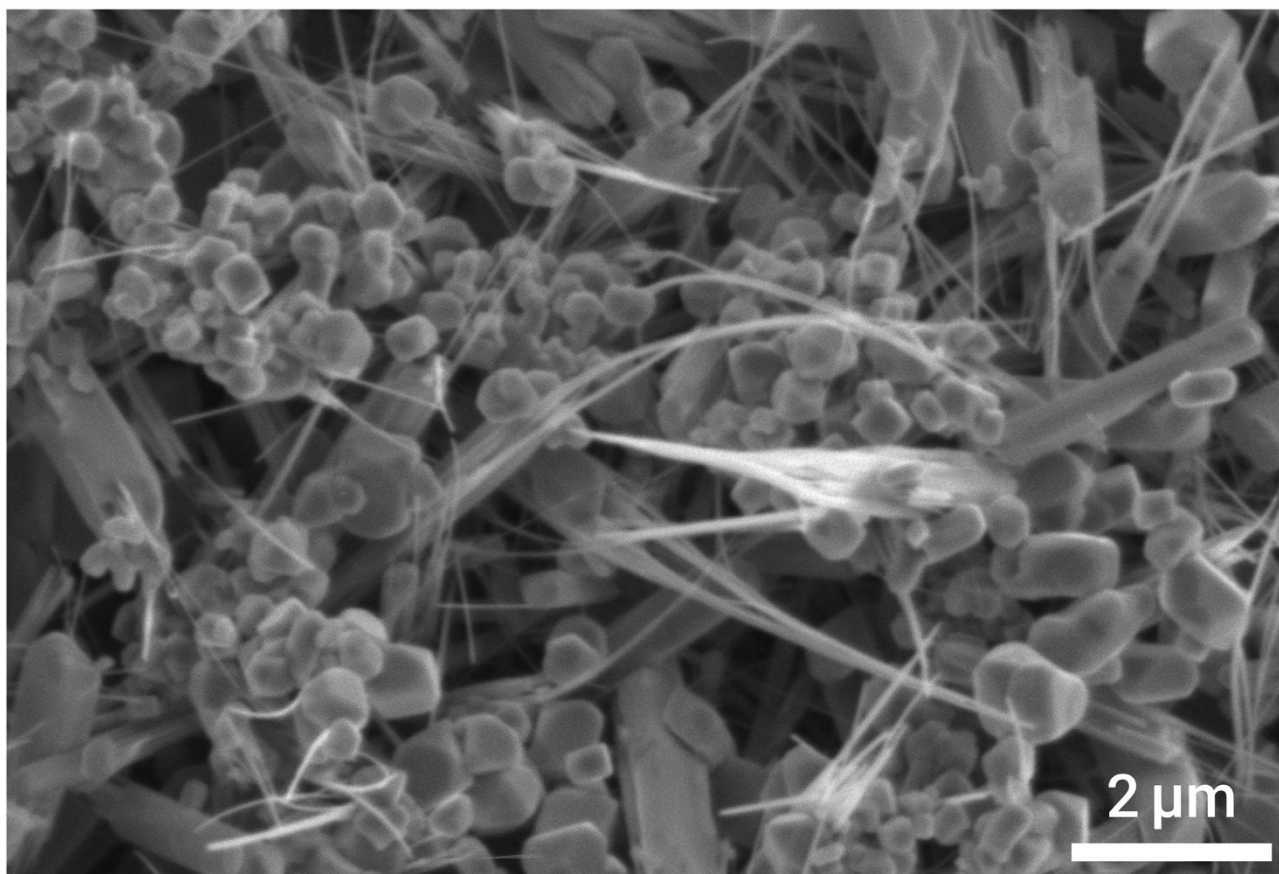

**Figure S7.** SEM image of the surface of a hydrothermally vapor-treated MnCO<sub>3</sub> compact after 12 h of exposure to 30% H<sub>2</sub>O<sub>2</sub> vapor.

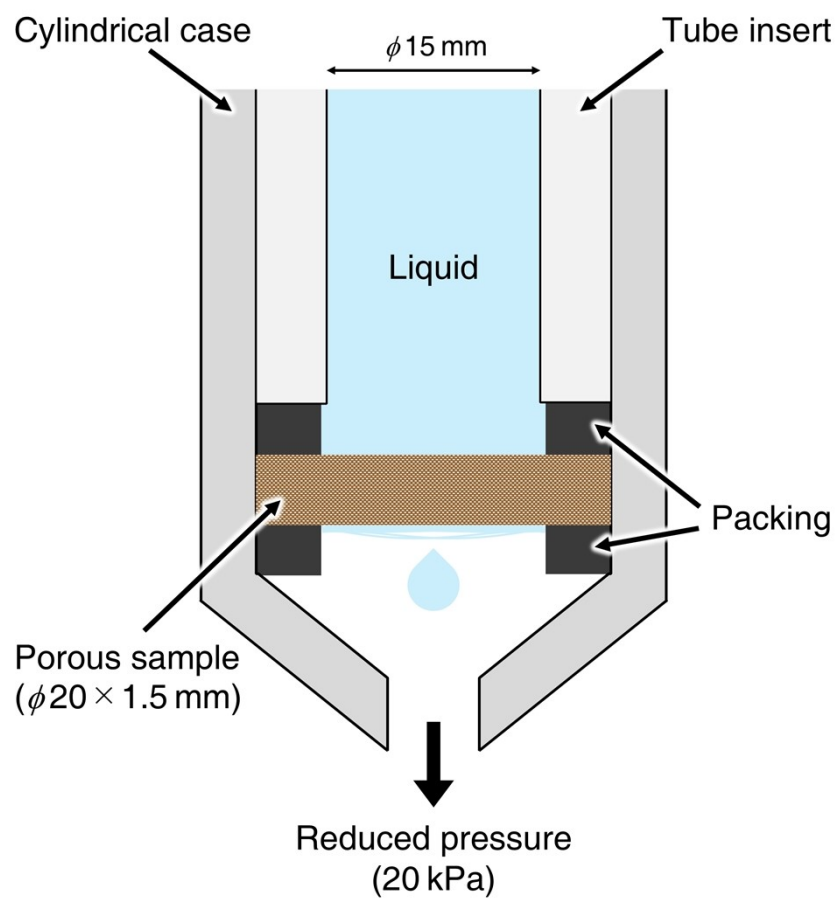

**Figure S8.** Schematic illustration of the filtration device.

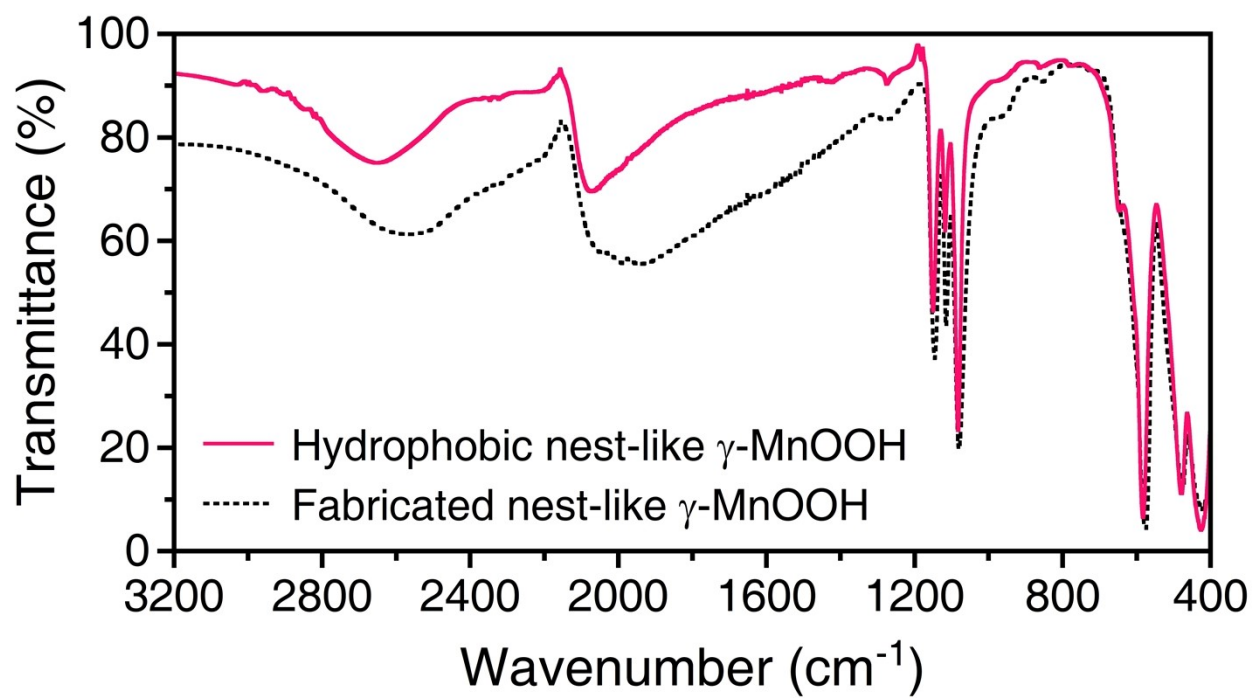

**Figure S9.** FTIR spectra of nest-like  $\gamma$ -MnOOH before and after surface modification by silanization.

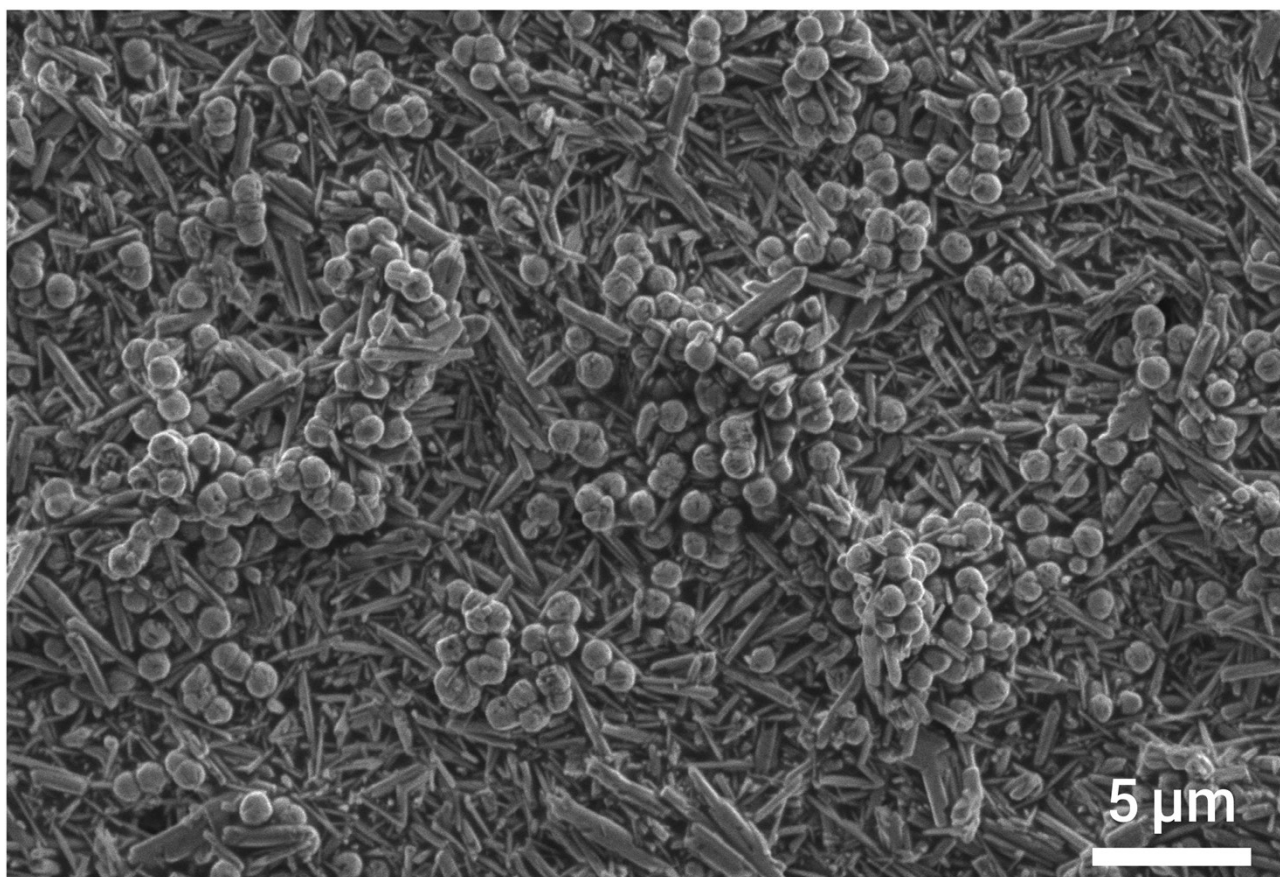

**Figure S10.** SEM image of the surface of a hydrophobic nest-like  $\gamma$ -MnOOH compact after the three-phase separation experiment; the spherical particles correspond to  $\text{Fe}_3\text{O}_4$  particles.

**Movie 1.** 3D internal structure of the nest-like porous  $\gamma$ -MnOOH reconstructed from FIB-SEM images.

**Movie 2.** Droplet rebounds on hydrophobic nest-like porous  $\gamma$ -MnOOH.
